# Supplementary material for: 3D-Printed Porous Magnetic Carbon Materials Derived from Metal–Organic Frameworks
Source: MDPI journal article supplement (doi:10.3390/polym13223881), 2021-11-10
Supplement: s1 [file s1]

Supplementary materials for  
**3D-Printed Porous Magnetic Carbon Materials Derived from Metal-Organic  
Frameworks**

*Anton Cherevko<sup>1,2</sup>, Igor Nikovskiy<sup>1</sup>, Yulia Nelyubina<sup>1,2</sup>, Kirill Skupov<sup>1</sup>, Nikolay Efimov<sup>3</sup>  
and Valentin Novikov<sup>1,2,\*</sup>*

<sup>1</sup>A.N.Nesmeyanov Institute of Organoelement Compounds, Russian Academy of  
Sciences, Vavilova str. 28, 119991 Moscow, Russia

<sup>2</sup>Moscow Institute of Physics and Technology, 141700, Institutskiy per., 9,  
Dolgoprudny, Moscow Region, Russia

<sup>3</sup>Kurnakov Institute of General and Inorganic Chemistry, Russian Academy of Sciences,  
Leninskii pr. 31, 119991 Moscow, Russia

\*Correspondence: novikov84@gmail.com

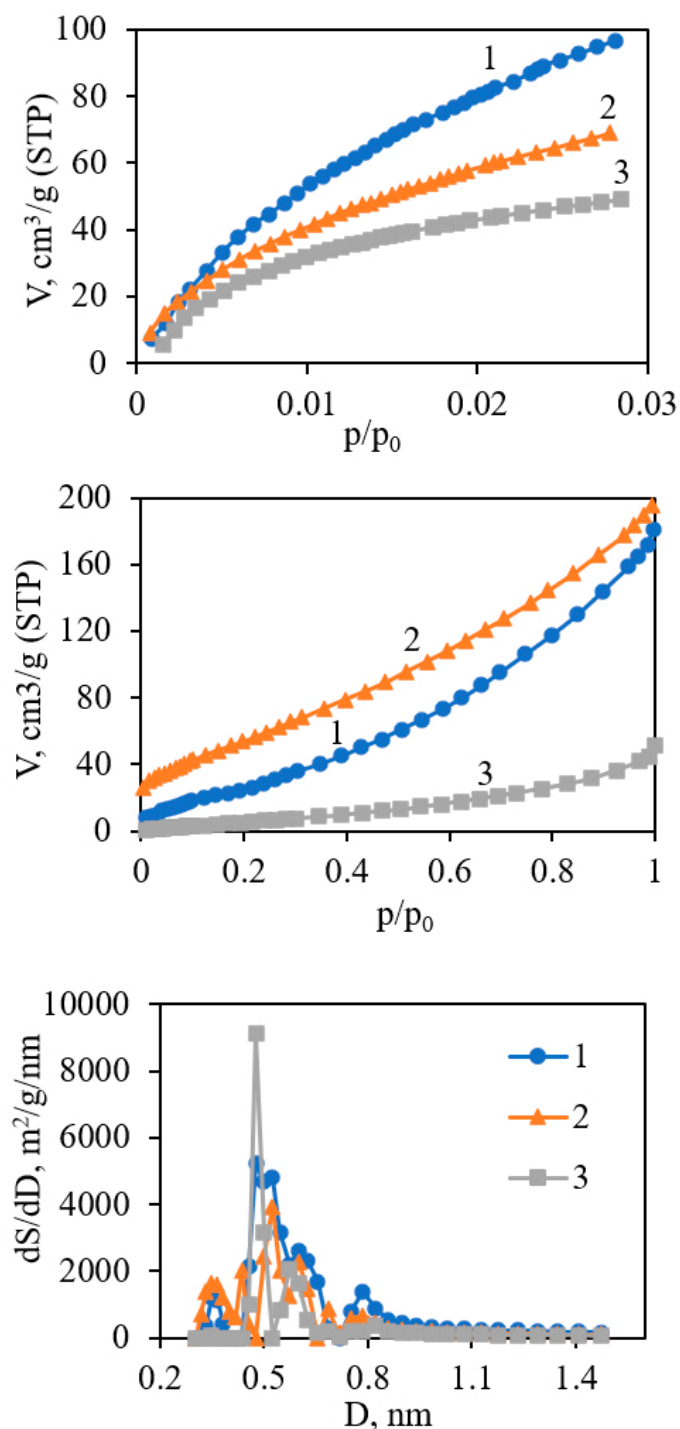

**Figure S1.** CO<sub>2</sub> adsorption isotherms at 273 K (top), N<sub>2</sub> adsorption isotherms at 77 K (center) and a plot of specific surface area vs. pore size according to NLDFT from CO<sub>2</sub> adsorption measurements for the pyrolyzed objects 3D-printed from the custom-made photopolymer composition filled with 5 wt.% of ZIF-8 (blue circles) and filled with 5 wt.% of ZIF-8 and 5 wt.% of Ni-BTC (red triangles) and from the commercial Harz Labs resin filled with 5 wt.% of Ni-BTC and 5 wt.% of ZIF-8 (grey squares).

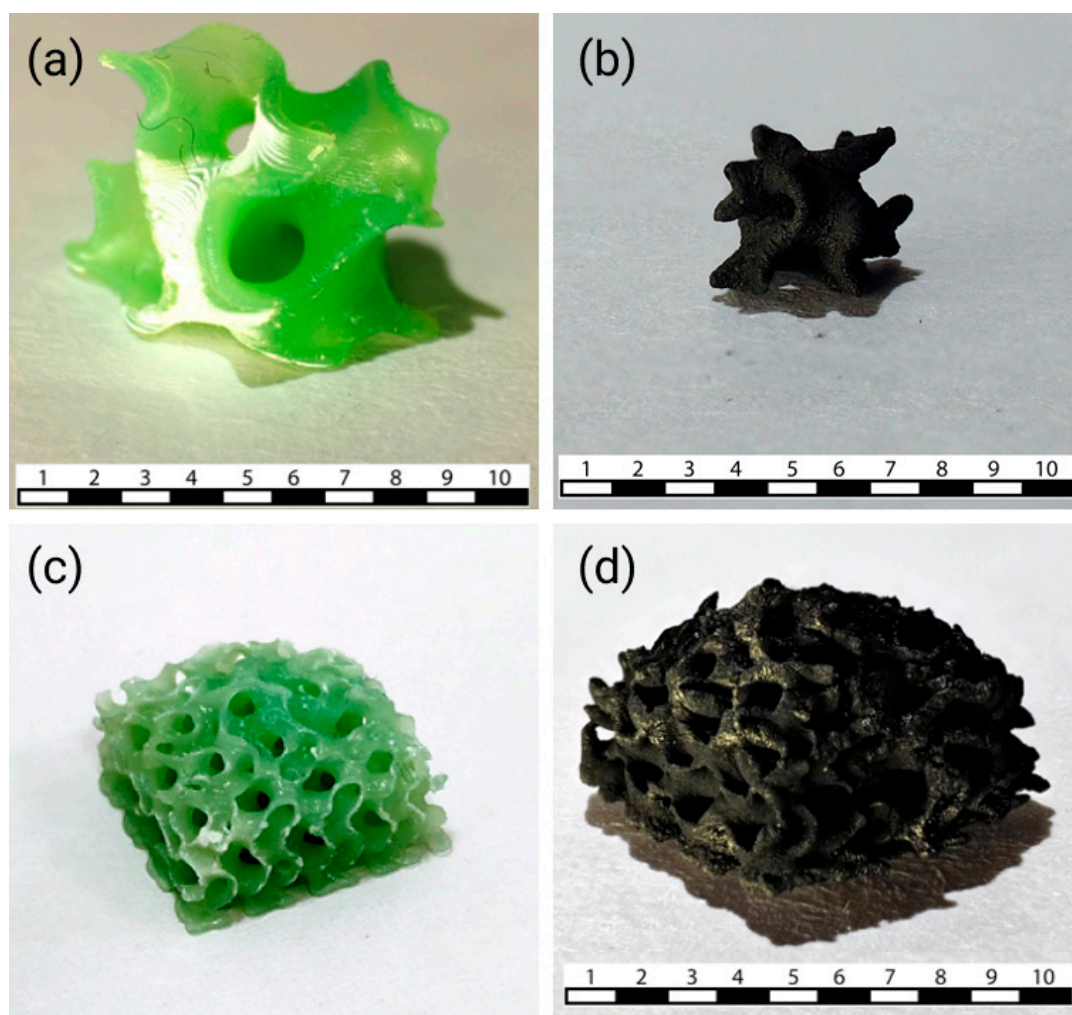

**Figure S2.** Objects 3D-printed from the custom-made photopolymer composition filled with 5 wt.% of Ni-BTC and 5 wt.% of ZIF-8 (a, b) and from the commercial Harz Labs resin filled with 5 wt.% of Ni-BTC and 5 wt.% of ZIF-8 (c, d) before (a, c) and after (b, d) the pyrolysis.
